# Supplementary material
Source: MDPI journal article supplement (https://www.mdpi.com/2313-0105/9/11/546)
Supplement: s1 [file s1]

## Supporting Information

### **Three-dimensional printing, an emerging advanced technique in electrochemical energy storage and conversion**

Shu Zhang <sup>1,2</sup>, Shuyue Xue <sup>1</sup>, Yaohui Wang <sup>1</sup>, Gufei Zhang <sup>3</sup>, Nayab Arif <sup>2</sup>, Peng Li <sup>1,\*</sup>,  
Yu-Jia Zeng <sup>2,\*</sup>

<sup>1</sup> Department of Chemical Engineering, Shandong University of Technology, Zibo, 255000, China.

<sup>2</sup> Key Laboratory of Optoelectronic Devices and Systems of Ministry of Education and Guangdong Province, College of Physics and Optoelectronic Engineering, Shenzhen University, 518060, China.

<sup>3</sup> POLIMA-Center for Polariton-driven Light-Matter Interactions & Danish Institute for Advanced Study, University of Southern Denmark, Campusvej 55, DK-5230 Odense M, Denmark.

\* Correspondence: szlapc@sdut.edu.cn (P.L.), yjzeng@szu.edu.cn (Y. J. Z.)

**Table S1** Brief summary of typical 3D printed electrocatalysts

| Materials                               | Testing condition                                      | $E_j = 10$ (V) <sup>b</sup> | Tafel slope<br>(mV dec <sup>-1</sup> ) | Ref. |
|-----------------------------------------|--------------------------------------------------------|-----------------------------|----------------------------------------|------|
| ZIF-67/Ti-E                             | 1.0 mol L <sup>-1</sup> NaOH                           | 360 mV                      | 66                                     | [24] |
| Gr/AME-Ni<br>Fe10%                      | 0.1 mol L <sup>-1</sup> KOH                            | 519 mV                      | 46                                     | [26] |
| MoS <sub>x</sub>                        | 0.5 mol L <sup>-1</sup> H <sub>2</sub> SO <sub>4</sub> | 297 mV                      | 119                                    | [25] |
| 3D GC/NiFeP                             | 1.0 mol L <sup>-1</sup> KOH                            | 120 mV                      | 97                                     | [22] |
| NiCo <sub>2</sub> S <sub>4</sub> needle | 1.0 mol L <sup>-1</sup> KOH                            | 226 mV                      | 38.7                                   | [23] |

**Table S2** Brief summary of typical 3D printed battery electrodes

| Material                         | Current density        | Capability                | Ref. |
|----------------------------------|------------------------|---------------------------|------|
| graphene/PAA                     | 40 mA g <sup>-1</sup>  | 500 mAh g <sup>-1</sup>   | [42] |
| SnO <sub>2</sub> QDs             | 0.05 A g <sup>-1</sup> | 991.6 mAh g <sup>-1</sup> | [43] |
| Ag nanoparticle                  | 0.1 C                  | 95 mAh g <sup>-1</sup>    | [44] |
| LiMn <sub>2</sub> O <sub>4</sub> | 0.5 C                  | 40 mAh g <sup>-1</sup>    | [45] |
| lithium cobalt oxide             | C/40                   | 121 mAh g <sup>-1</sup>   | [46] |
| LFP fiber                        | 50 mA g <sup>-1</sup>  | 110 mAh g <sup>-1</sup>   | [30] |
| LaB <sub>6</sub> /SP@S           | 1 C                    | 600 mAh g <sup>-1</sup>   | [31] |
| 3DP-NC                           | 10 mA cm <sup>-2</sup> | 30 mAh cm <sup>-2</sup>   | [36] |
| 3D Na@rGO/CNT                    | 100 mA g <sup>-1</sup> | 67.6 mAh g <sup>-1</sup>  | [37] |
